# Supplementary material
Source: bioRxiv or medRxiv preprint supplement (https://medrxiv.org/highwire/filestream/79142/field_highwire_adjunct_files/0/2020.05.02.20084673-1.pdf)
Supplement: Supplementary file [file 2020.05.02.20084673-1.pdf]

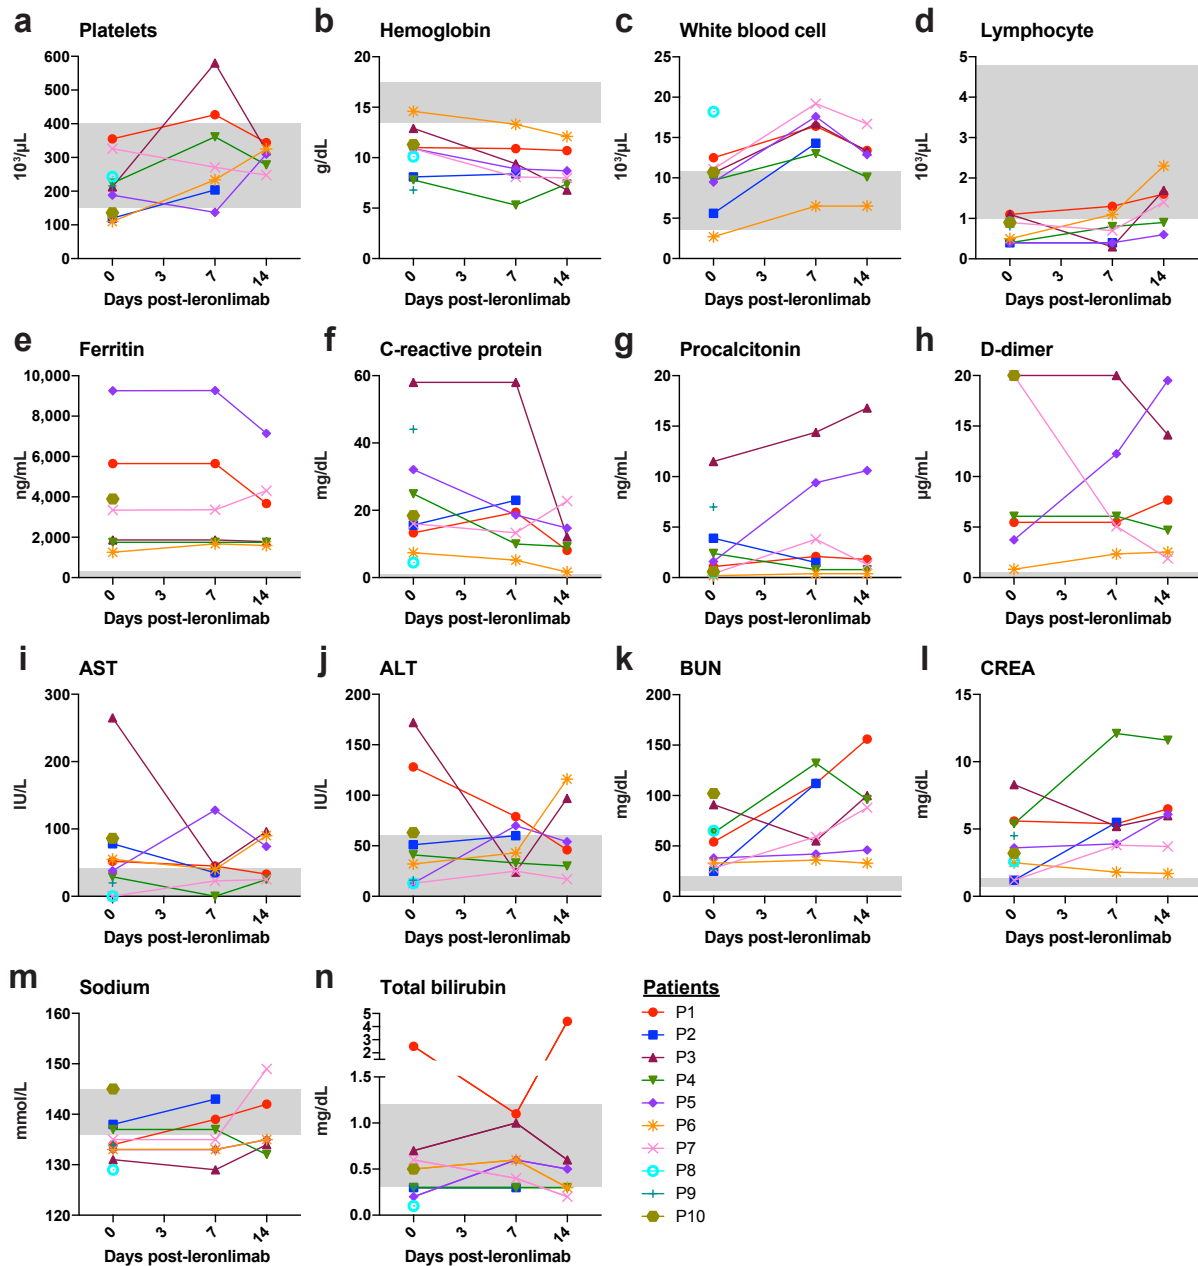

**Supplementary Figure 1. Complete blood count and serum chemistry values in critically ill COVID-19 patients after leronlimab administration.** a-d, Peripheral blood levels of platelets (a), hemoglobin (b), white blood cells (c), and lymphocytes (d). Serum levels of ferritin (e), C-reactive protein (f), Procalcitonin (g), D-dimer, values >20 graphed as 20 (h), aspartate aminotransferases (AST), values <20 graphed as 0 (i), alanine aminotransferase (ALT), values <10 graphed as 0 (j), blood urea nitrogen (BUN) (k), creatinine (CREA) (l), sodium (m), and total bilirubin (n). Gray boxes indicate standard reference ranges for each parameter.

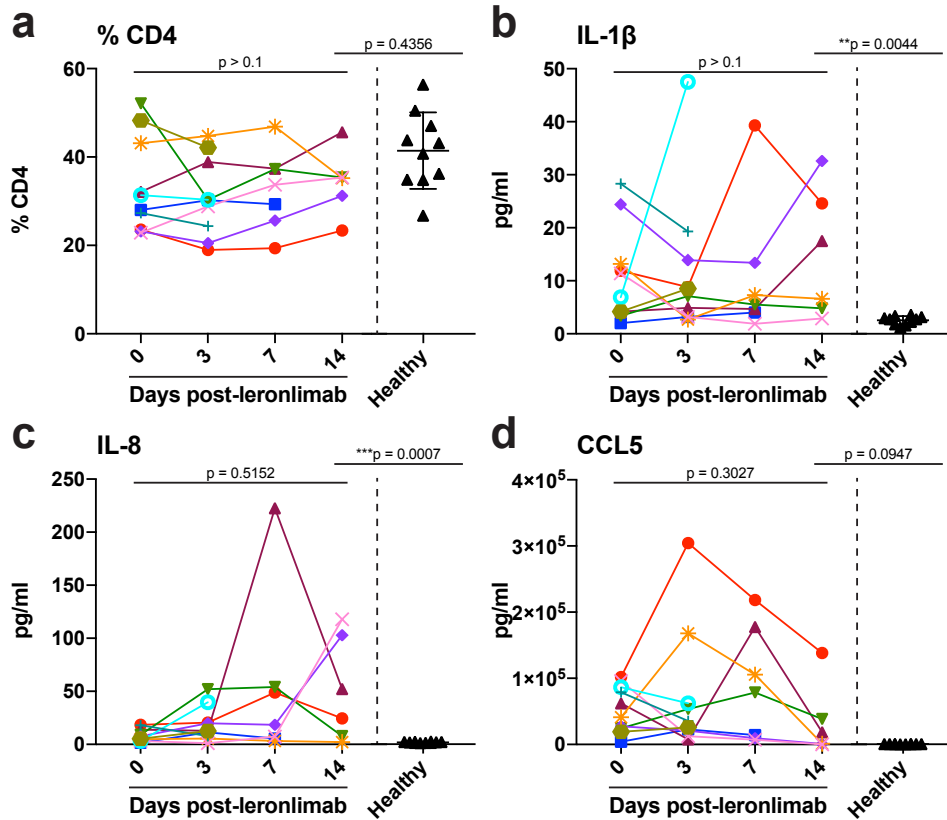

**Supplementary Figure 2. Immunological parameters in critically ill COVID19 patients after leronlimab administration.** a-d, Peripheral blood CD4+ T cell percentages of CD3+ cells, and plasma levels of IL-1 $\beta$  (b), IL-8 (c), and CCL5 (d) at days 0 (n=10), 3 (n=10), 7 (n=7), and 14 (n=6) post-leronlimab administration. Healthy controls (n=10) shown in black triangles. Graphs display p-values calculated by Dunn's Kruskal-Wallis test: not significant  $p > 0.05$ , \* $p \leq 0.05$ , \*\*  $p \leq 0.01$ , \*\*\* $p \leq 0.001$ , \*\*\*\* $p \leq 0.0001$ .

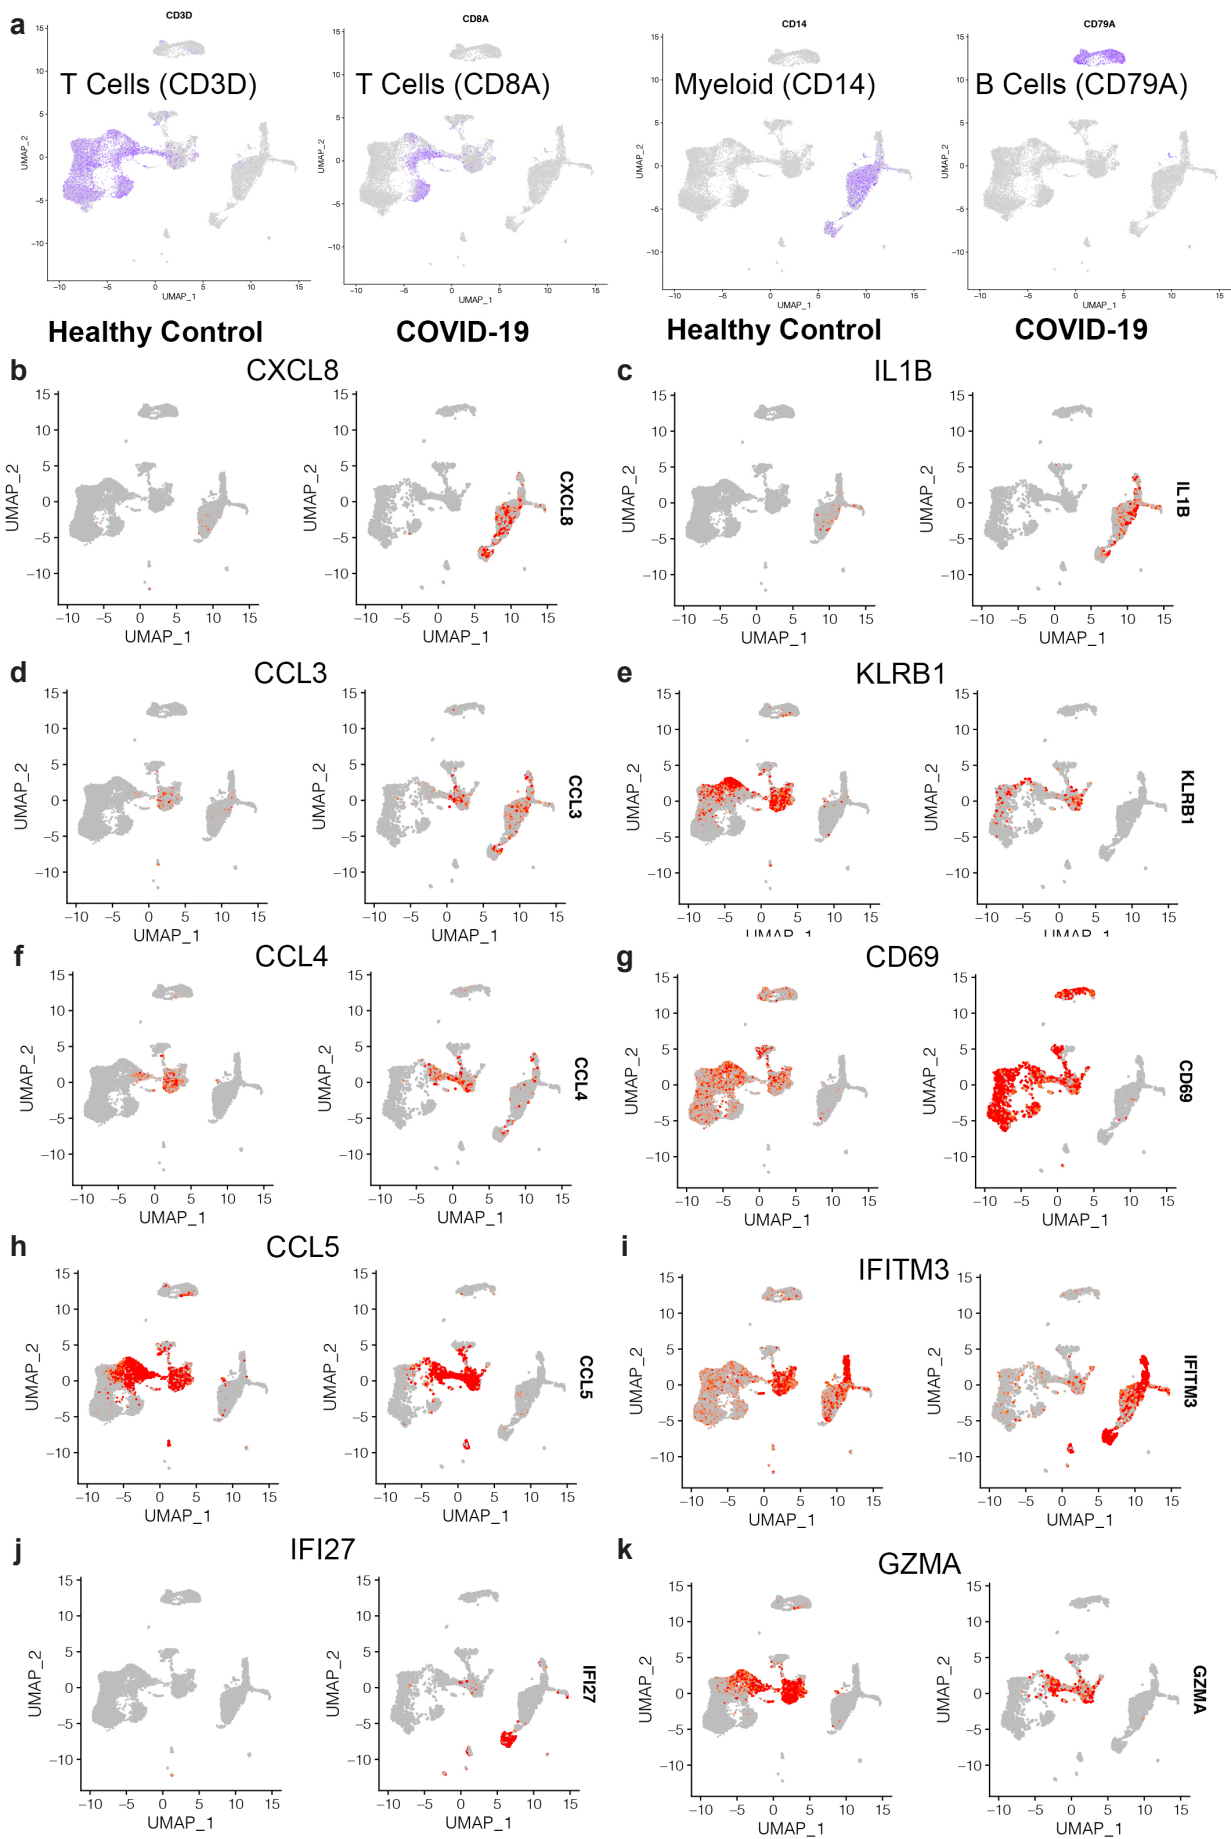

**Supplementary Figure 3. Single-cell transcriptomics associated with critical COVID-19.**

**a-k**, UMAP feature plots of single-cell transcriptome profiles CD3<sup>+</sup> T cells versus CD8<sup>+</sup> T cells versus CD14<sup>+</sup> myeloid cells versus CD79a B cells (**a**) of CXCL8 (**b**), IL-1 $\beta$  (**c**), CCL3 (**d**), KLRB1 (**e**), CCL4 (**f**), CD69 (**fg**), CCL5 (**h**), IFITIM3 (**i**), IFI27 (**j**), and Granzyme A (**k**) in a healthy uninfected participant and severe COVID-19 participants.

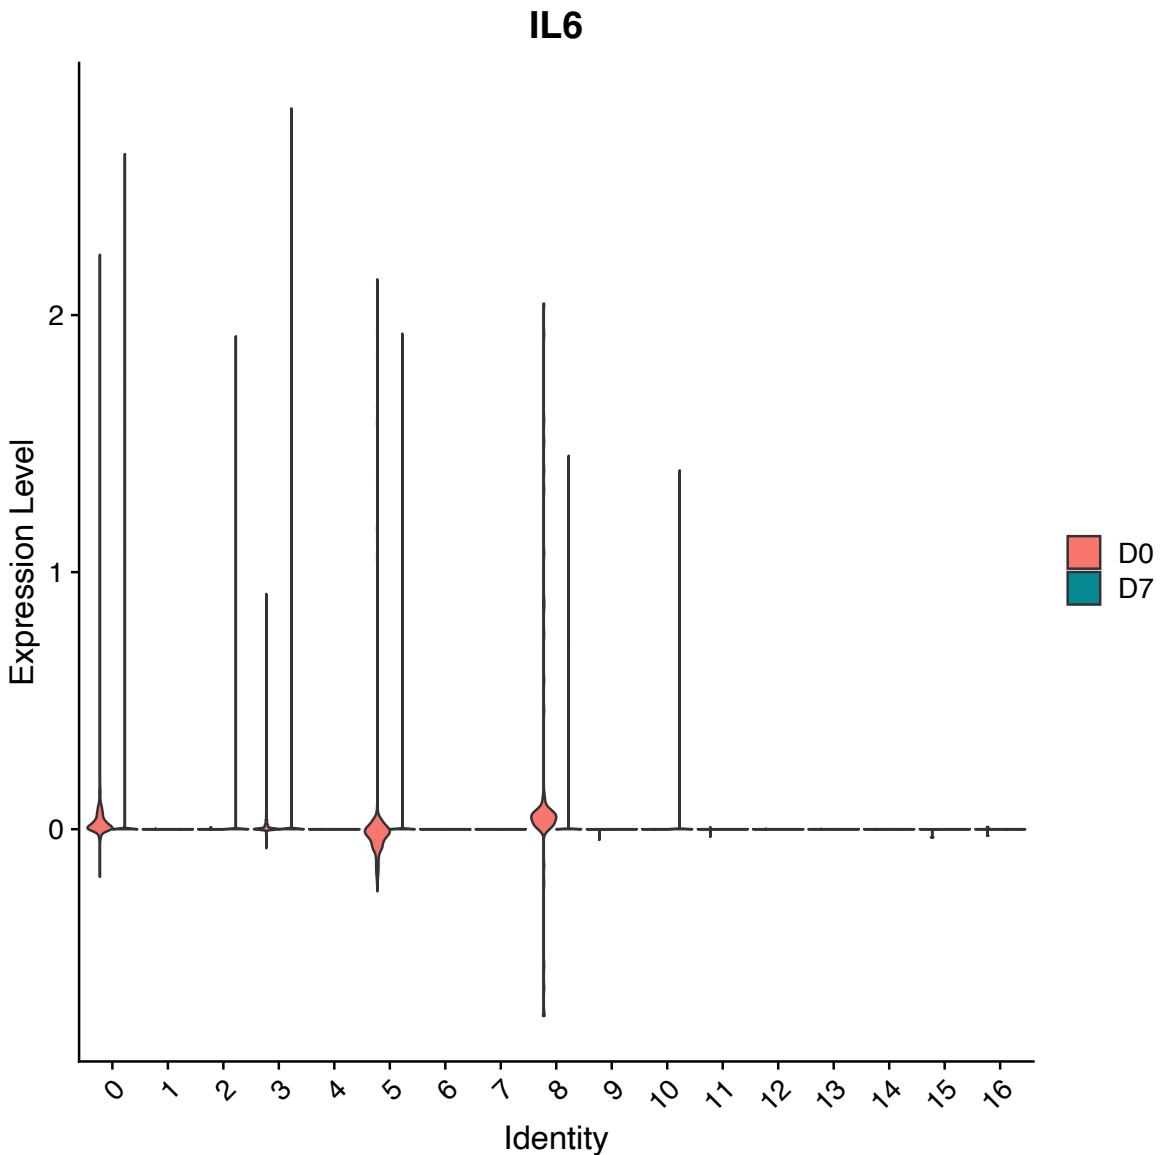

**Supplementary Figure 4. Violin plot of IL-6 gene transcripts in single cell transcriptome clusters of COVID-19 participants before and 7 days following leronlimab.** Low levels of IL-6 transcription are observed across multiple cell clusters at day 7 post leronlimab (D7) compared to baseline (D0). Of note, IL6 gene expression significantly reduced in myeloid cell cluster 8 comparing baseline and 7 days post leronlimab.

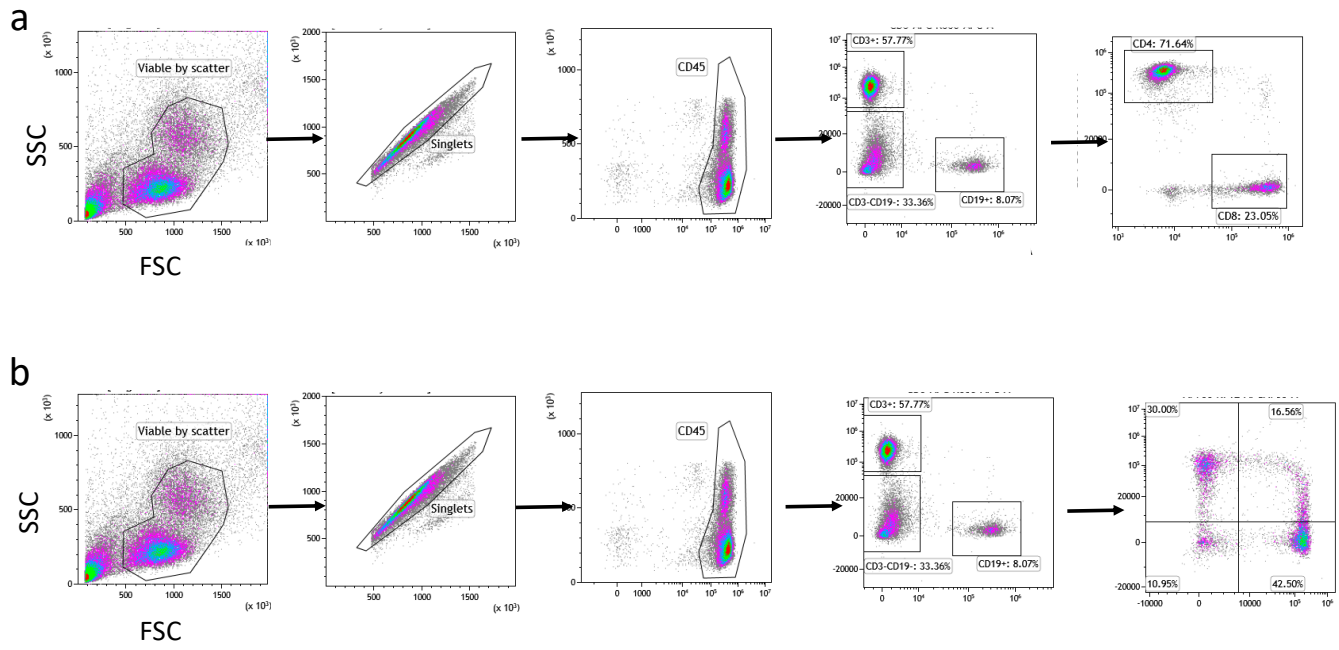

**Supplementary Figure 5. Example gating strategy for flow cytometry. a-b,** Gating hierarchy for determination of peripheral blood CD4+ and CD8+ T cells: viable/singlets/CD45+/CD3+CD19-/CD4+ or CD8+ (**a**), and for peripheral blood monocytes: viable/singlets/CD45+/CD3-CD19-/CD14+CD16+ according to methods (**b**).

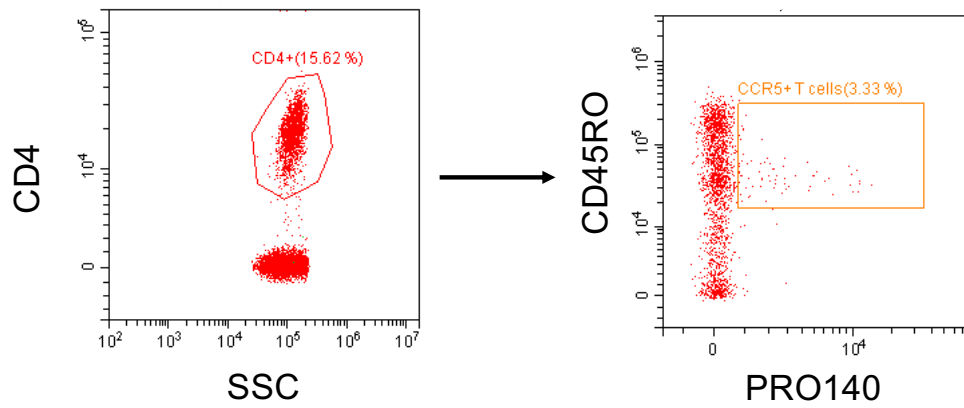

**Supplementary Figure 6. Example gating strategy of CCR5 receptor occupancy for flow cytometry.** Leronlimab-PE was used to stain the peripheral blood of a COVID-19 patient that had received 700mg subcutaneous Leronlimab.

| <b>Immune Profiling Markers</b> | <b>luorochrom</b> | <b>Clone</b> | <b>Vendor</b> | <b>µg per Test</b> |
|---------------------------------|-------------------|--------------|---------------|--------------------|
| CD8                             | BUV496            | RPA-T8       | BD            | 0.2                |
| CD4                             | BUV661            | SK3          | BD            | 0.08               |
| CD45                            | BUV805            | HI30         | BD            | 0.1                |
| CD103                           | BV421             | Ber-ACT8     | BioLegend     | 0.2                |
| TIM3                            | BV605             | 7D3          | BD            | 0.6                |
| CD56                            | BV650             | HCD56        | BioLegend     | 0.3                |
| LAG-3                           | BV711             | 11C3C65      | BioLegend     | 0.3                |
| CD14                            | BV786             | M5E2         | BioLegend     | 0.3                |
| PD-1                            | BB700             | EH12.1       | BD            | 0.6                |
| FoxP3                           | PE                | 259D/C7      | BD            | 0.3                |
| CD19                            | PE-Dazzle5        | HIB19        | BioLegend     | 0.15               |
| CD3                             | APC               | UCHT1        | BioLegend     | 0.05               |
| CTLA-4                          | PE-Cy7            | BN13         | BioLegend     | 0.3                |
| CD16                            | AF700             | 3G8          | BioLegend     | 0.75               |
| HLA-DR                          | APC/Fire750       | L243         | BioLegend     | 0.6                |

| <b>Receptor Occupancy Markers</b> | <b>luorochrom</b> | <b>Clone</b> | <b>Vendor</b>   | <b>µg per Test</b> |
|-----------------------------------|-------------------|--------------|-----------------|--------------------|
| CD4                               | FITC              | SK3          | BioLegend       | 0.1                |
| CD14                              | PerCP Cy5.5       | HCD14        | BioLegend       | 0.6                |
| PRO140                            | PE                | PRO140       | IncellDx        | 0.25               |
| CD16                              | Alexa647          | 3G8          | BD              | 0.5                |
| FoxP3                             | Alexa647          | 206D         | Biolegend       | 0.12               |
| CD45RO                            | PE-Cy7            | UCHL1        | Beckman Coulter | 0.25               |

**Supplementary Table 1. List of antibodies utilized in the study.**
